# Supplementary material for: Enrichment of lung cancer computed tomography collections with AI-derived annotations
Source: PubMed Central journal article supplement (PMC10766991; doi:10.1038/s41597-023-02864-y), 2024-01-04
Supplement: 41597_2023_2864_MOESM1_ESM.pdf [file 41597_2023_2864_MOESM1_ESM.pdf]

# Supplementary Information

**Figure S1**

**2**

**Table S1**

**4**

Figure S1

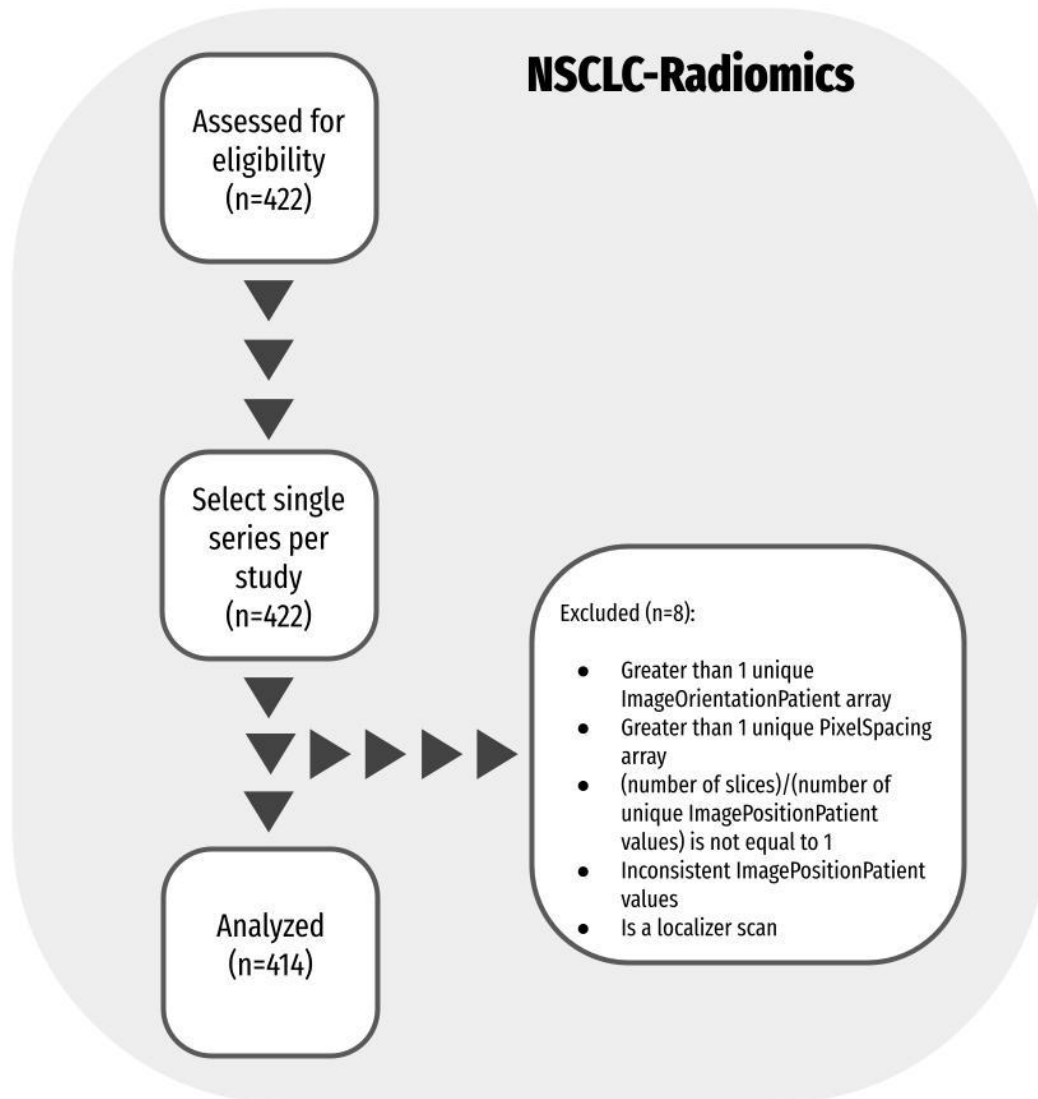

a) Filtering for the NSCLC-Radiomics collection DICOM CT series selected for the analysis.

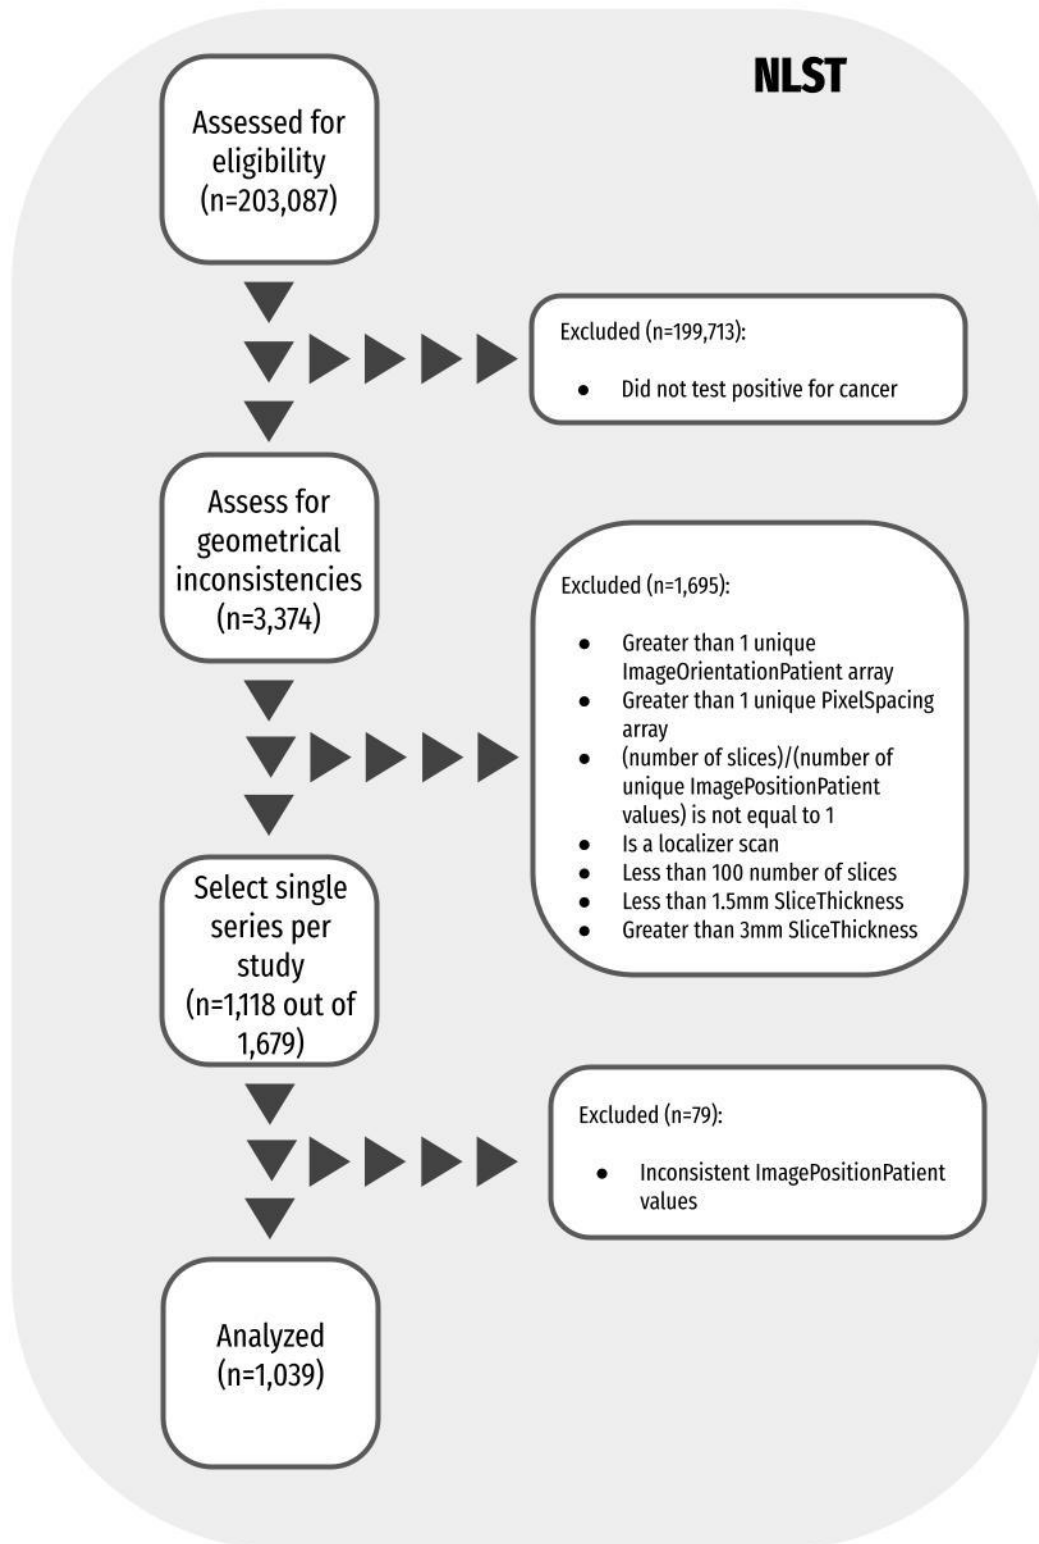

*b) Filtering for the NLST collection DICOM CT series selected for the analysis.*

*Figure S1 - Overview of the selection process of series for the a) NSCLC-Radiomics collection, and the b) NLST collection.*

## Table S1

The landmarks produced from the body part prediction neural network were saved as DICOM Structured Reports, where a single report is saved for each series analyzed. The highdicom package<sup>24</sup> was used to generate the SR. The table below holds the information concerning the mapping of each of the body part regression codes to specific bones and landmarks. The optional modifier holds information about the location of the particular anatomical landmark. The table is also available here [[https://github.com/ImagingDataCommons/nnU-Net-BPR-annotations/blob/main/bpr/data/bpr\\_landmarks\\_code\\_mapping.csv](https://github.com/ImagingDataCommons/nnU-Net-BPR-annotations/blob/main/bpr/data/bpr_landmarks_code_mapping.csv)]. The list of landmarks was retrieved from the landmark look up table.<sup>8</sup>

| BPR_code | CodingScheme Designator | CodeValue | CodeMeaning | modifier_CodingScheme Designator | modifier_CodeValue | modifier_CodeMeaning |
|----------|-------------------------|-----------|-------------|----------------------------------|--------------------|----------------------|
| C1       | SCT                     | 14806007  | C1 vertebra | DCM                              | 111010             | Center               |
| C2       | SCT                     | 39976000  | C2 vertebra | DCM                              | 111010             | Center               |
| C3       | SCT                     | 113205007 | C3 vertebra | DCM                              | 111010             | Center               |
| C4       | SCT                     | 5329002   | C4 vertebra | DCM                              | 111010             | Center               |
| C5       | SCT                     | 36978003  | C5 vertebra | DCM                              | 111010             | Center               |
| C6       | SCT                     | 36054005  | C6 vertebra | DCM                              | 111010             | Center               |
| C7       | SCT                     | 87391001  | C7 vertebra | DCM                              | 111010             | Center               |
| Th1      | SCT                     | 64864005  | T1 vertebra | DCM                              | 111010             | Center               |
| Th2      | SCT                     | 53733008  | T2 vertebra | DCM                              | 111010             | Center               |
| Th3      | SCT                     | 1626008   | T3 vertebra | DCM                              | 111010             | Center               |
| Th4      | SCT                     | 73071006  | T4 vertebra | DCM                              | 111010             | Center               |
| Th5      | SCT                     | 56401006  | T5 vertebra | DCM                              | 111010             | Center               |
| Th6      | SCT                     | 45296009  | T6 vertebra | DCM                              | 111010             | Center               |
| Th7      | SCT                     | 62487009  | T7 vertebra | DCM                              | 111010             | Center               |
| Th8      | SCT                     | 11068009  | T8 vertebra | DCM                              | 111010             | Center               |
| Th9      | SCT                     | 82687006  | T9 vertebra | DCM                              | 111010             | Center               |

|              |     |            |                                             |      |           |        |
|--------------|-----|------------|---------------------------------------------|------|-----------|--------|
| Th10         | SCT | 7610001    | T10 vertebra                                | DCM  | 111010    | Center |
| Th11         | SCT | 12989004   | T11 vertebra                                | DCM  | 111010    | Center |
| Th12         | SCT | 23215003   | T12 vertebra                                | DCM  | 111010    | Center |
| L1           | SCT | 66794005   | L1 vertebra                                 | DCM  | 111010    | Center |
| L2           | SCT | 14293000   | L2 vertebra                                 | DCM  | 111010    | Center |
| L3           | SCT | 36470004   | L3 vertebra                                 | DCM  | 111010    | Center |
| L4           | SCT | 11994002   | L4 vertebra                                 | DCM  | 111010    | Center |
| L5           | SCT | 49668003   | L5 vertebra                                 | DCM  | 111010    | Center |
| pelvis_start | SCT | 8106092008 | Pelvis                                      | SCT  | 42161009  | Bottom |
| femur_end    | SCT | 71341001   | Femur                                       | SCT  | 421812003 | Top    |
| pelvis_end   | SCT | 8106092008 | Pelvis                                      | SCT  | 421812003 | Top    |
| kidney       | SCT | 64033007   | Kidney                                      | None | None      | None   |
| lung_start   | SCT | 39607008   | Lung                                        | SCT  | 42161009  | Bottom |
| lung_end     | SCT | 39607008   | Lung                                        | SCT  | 421812003 | Top    |
| liver_end    | SCT | 10200004   | Liver                                       | SCT  | 421812003 | Top    |
| teeth        | SCT | 28035005   | Teeth, gums<br>and supporting<br>structures | DCM  | 111010    | Center |
| nose         | SCT | 45206002   | Nose                                        | SCT  | 42161009  | Bottom |
| eyes_end     | SCT | 81745001   | Eye                                         | SCT  | 421812003 | Top    |
| head_end     | SCT | 69536005   | Head                                        | SCT  | 421812003 | Top    |

*Table S1 - The landmark code mapping file used to create the TID1500 DICOM Structured Reports*
